# Supplementary material for: Green facile fabrication of halogen-free flame-retardant ABS with high mechanical performance
Source: Royal Society of Chemistry journal article supplement (doi:10.1039/d5ra01392e), 2025-01-01
Supplement: d5ra01392e1.pdf [file d5ra01392e1.pdf]

## Supplementary information

### 2 Experimental Section

#### 2.1 Materials

Cerium chloride (AR,  $\geq 99.9\%$ ) was received from Xiya Chemical Technology Co. Ltd. (Shandong, China). Ammonium polyphosphate (form II, degree of polymerization:  $\geq 1000$ ) was obtained from Changfeng Chemical Co. Ltd. (Sichuan, China). ABS resin (GN-II) was purchased from China National Petroleum Co. Ltd. (Jilin, China). Anhydrous ethanol (AR,  $\geq 99.7\%$ ) was provided by Sinopharm Group chemical reagents Co. Ltd. (Shanghai, China).

#### 2.2 Characterization

X-ray diffraction using a Smart Lab 3KW instrument with Cu K $\alpha$  radiation ( $\lambda = 0.154$ ) at the scan rate  $10^\circ/\text{min}$  under scan range  $10\text{--}60^\circ$ . X-ray photoelectron spectroscopy was performed on an ESCALAB Xi+ electron spectrometer (Thermo Fisher Scientific, US) using 300 W Al K $\alpha$  radiation. Ce and P contents were tested by inductively coupled plasma-atomic emission spectrometry (USA). Surface morphology and elemental analysis were characterised by scanning electron microscopy (JSM-6390LV, Nippon Electron, Japan) and energy dispersive X-ray spectroscopy. Thermogravimetric testing was performed on TA 5500 under the nitrogen atmosphere at  $25^\circ\text{C}/\text{min}$  during  $40\text{--}750^\circ\text{C}$ . The limiting oxygen index and the UL-94 vertical burning level test were performed using TTech-GBT2406 oxygen index meter and TTech-GBT2408 instrument (TTech., China), respectively. An evaluation of the combustion behaviour of samples with dimensions of  $100\text{ mm} \times 100\text{ mm} \times 3\text{ mm}$  in a cone calorimeter with a heat flux of  $30\text{ kW}/\text{m}^2$  (Fire Testing Technology, UK). Laser Raman spectroscopy data were collected by a SPEX-

1403 laser Raman spectrometer with 514.5 nm argon laser. Thermogravimetric-Fourier Transform Infrared Spectroscopy consists of a TG 209 F1 (NETZSCH, Germany) and a 170 SX FTIR spectrometer (Nicolet, USA). Tensile and flexural properties were tested with an INSTRON 5967 Tester (Instron., USA) at 20 mm/min according to ASTM D638 and ASTM D790, respectively.

**Table S1** TGA data of ABS composites in N<sub>2</sub> atmosphere

| Sample | T <sub>5%</sub> (°C) | R <sub>max</sub> (%/min) | T <sub>max</sub> (°C) | W <sub>750</sub> (wt%) |
|--------|----------------------|--------------------------|-----------------------|------------------------|
| APP    | 323.6                | -                        | 325.2                 | 31.6                   |
| Ce@APP | 320.2                | -                        | 320.2                 | 33.4                   |
| ABS1   | 400.0                | -2.2                     | 443.2                 | 0.36                   |
| ABS2   | 385.1                | -1.6                     | 443.3                 | 10.3                   |
| ABS3   | 328.6                | -1.6                     | 441.6                 | 10.3                   |
| ABS6   | 330.2                | -1.6                     | 443.3                 | 12.5                   |

T<sub>5%</sub>: The temperature where 5 wt% of weight was lost;

R<sub>max</sub>: The maximum weight loss rate;

T<sub>max</sub>: The temperature where the maximum weight loss occurs;

W<sub>750</sub>: The residual weight at 750 °C.
